# Supplementary material for: Highly enantioselective iridium-catalysed allylic aminations with anionic N-nucleophiles
Source: Royal Society of Chemistry journal article supplement (doi:10.1039/b505197e), 2005-01-01

## **Electronic Supplementary Information**

ad

### **Highly enantioselective iridium-catalysed allylic aminations with anionic N-nucleophiles**

**Robert Weihofen, Axel Dahnz, Olena Tverskoy and Günter Helmchen\***

**Determination of enantiomeric excess of branched products 2 (cf. Table 1 of publication) by HPLC:**

column: Daicel Chiralcel AD-H/OD-H, 4.6 x 250 mm with pre-column AD-H/OD-H, 10 x 4 mm; eluent: *n*-hexane/*iso*-propanol, flow 0.5 mL/min, UV detection  $\lambda = 210$  nm, 254 nm)

| R <sup>1</sup>                     | Ar           | R <sup>2</sup>                                     | <i>n</i> -hexane/<br><i>iso</i> -propanol | Column | t <sub>R</sub> (min)<br>minor | t <sub>R</sub> (min)<br>major |
|------------------------------------|--------------|----------------------------------------------------|-------------------------------------------|--------|-------------------------------|-------------------------------|
| Ph                                 | <i>p</i> -Ts | CH <sub>2</sub> Ph                                 | 90:10                                     | AD-H   | 31.69                         | 36.67                         |
| CH <sub>2</sub> CH <sub>2</sub> Ph | <i>p</i> -Ts | CH <sub>2</sub> Ph                                 | 90:10                                     | OD-H   | 20.66                         | 17.31                         |
| Ph                                 | <i>o</i> -Ns | CH <sub>2</sub> Ph                                 | 90:10                                     | AD-H   | 46.98                         | 43.98                         |
| CH <sub>2</sub> CH <sub>2</sub> Ph | <i>o</i> -Ns | CH <sub>2</sub> Ph                                 | 90:10                                     | AD-H   | 39.02                         | 31.10                         |
| Ph                                 | <i>p</i> -Ns | CH <sub>2</sub> Ph                                 | 90:10                                     | AD-H   | 43.68                         | 58.47                         |
| CH <sub>2</sub> CH <sub>2</sub> Ph | <i>p</i> -Ns | CH <sub>2</sub> Ph                                 | 95:5                                      | AD-H   | 90.16                         | 96.56                         |
| CH=CHPh                            | <i>p</i> -Ns | CH <sub>2</sub> Ph                                 | 75:25                                     | AD-H   | 34.37                         | 31.24                         |
| 3-Pyridyl                          | <i>p</i> -Ns | CH <sub>2</sub> Ph                                 | 70:30                                     | AD-H   | 31.17                         | 41.85                         |
| Ph                                 | <i>p</i> -Ns | H                                                  | 90:10                                     | OD-H   | 53.71                         | 60.68                         |
| Ph                                 | <i>p</i> -Ns | H                                                  | 90:10                                     | AD-H   | 37.27                         | 43.49                         |
| Ph                                 | <i>p</i> -Ns | CH <sub>2</sub> CH=CH <sub>2</sub>                 | 95:5                                      | AD-H   | 33.86                         | 34.79                         |
| 3-Pyridyl                          | <i>p</i> -Ns | CH <sub>2</sub> CH=CH <sub>2</sub>                 | 80:20                                     | AD-H   | 39.16                         | 58.72                         |
| Ph                                 | <i>p</i> -Ns | (CH <sub>2</sub> ) <sub>2</sub> CH=CH <sub>2</sub> | 95:5                                      | AD-H   | 30.13                         | 32.54                         |
| 3-Pyridyl                          | <i>p</i> -Ns | (CH <sub>2</sub> ) <sub>2</sub> CH=CH <sub>2</sub> | 80:20                                     | AD-H   | 34.95                         | 37.25                         |

**X-ray crystal structure analysis of compound 7t:**

Supplier of crystal: A. Dahnz (AK Helmchen)

File name : ad1.\*

Operator : Thomas Oeser

Instrument : Bruker Smart APEX

The data are available from the Cambridge Crystallographic Data Center: CCDC No 267826.

Bond lengths (Å) and angles (deg) for ad1.

|        |            |         |            |
|--------|------------|---------|------------|
| S1-O2  | 1.4346(9)  | C4-C7   | 1.4999(16) |
| S1-O1  | 1.4353(8)  | C4-H4   | 0.953(15)  |
| S1-N1  | 1.6052(10) | C5-C6   | 1.3198(17) |
| S1-C11 | 1.7751(11) | C5-H5   | 0.907(16)  |
| O3-N2  | 1.2238(14) | C6-H6A  | 0.958(18)  |
| O4-N2  | 1.2294(15) | C6-H6B  | 0.946(17)  |
| N1-C1  | 1.4928(15) | C7-C8   | 1.3210(18) |
| N1-C4  | 1.4984(14) | C7-H7   | 0.940(19)  |
| N2-C14 | 1.4780(14) | C8-H8A  | 0.93(2)    |
| C1-C5  | 1.5021(15) | C8-H8B  | 0.937(17)  |
| C1-C2  | 1.5351(16) | C11-C12 | 1.3937(15) |
| C1-H1  | 0.972(15)  | C11-C16 | 1.3940(15) |
| C2-C3  | 1.5310(19) | C12-C13 | 1.3915(15) |
| C2-H2A | 0.996(17)  | C12-H12 | 0.952(16)  |
| C2-H2B | 0.974(16)  | C13-C14 | 1.3868(16) |
| C3-C4  | 1.5365(17) | C13-H13 | 0.918(16)  |
| C3-H3A | 0.947(19)  | C14-C15 | 1.3855(17) |
| C3-H3B | 0.956(17)  | C15-C16 | 1.3860(16) |

|            |            |             |            |
|------------|------------|-------------|------------|
| C15-H15    | 0.969(15)  | C7-C4-C3    | 112.52(10) |
| C16-H16    | 0.912(17)  | N1-C4-H4    | 109.3(9)   |
| O2-S1-O1   | 119.88(5)  | C7-C4-H4    | 108.5(9)   |
| O2-S1-N1   | 107.25(5)  | C3-C4-H4    | 112.7(9)   |
| O1-S1-N1   | 108.14(5)  | C6-C5-C1    | 124.20(11) |
| O2-S1-C11  | 107.55(5)  | C6-C5-H5    | 120.9(10)  |
| O1-S1-C11  | 105.79(5)  | C1-C5-H5    | 114.9(10)  |
| N1-S1-C11  | 107.71(5)  | C5-C6-H6A   | 119.9(11)  |
| C1-N1-C4   | 113.65(9)  | C5-C6-H6B   | 122.4(10)  |
| C1-N1-S1   | 121.63(7)  | H6A-C6-H6B  | 117.6(15)  |
| C4-N1-S1   | 123.10(8)  | C8-C7-C4    | 122.81(12) |
| O3-N2-O4   | 124.18(10) | C8-C7-H7    | 118.2(11)  |
| O3-N2-C14  | 118.15(10) | C4-C7-H7    | 119.0(11)  |
| O4-N2-C14  | 117.68(11) | C7-C8-H8A   | 119.6(12)  |
| N1-C1-C5   | 111.50(9)  | C7-C8-H8B   | 122.1(11)  |
| N1-C1-C2   | 101.66(9)  | H8A-C8-H8B  | 118.3(16)  |
| C5-C1-C2   | 111.69(10) | C12-C11-C16 | 121.32(10) |
| N1-C1-H1   | 110.1(9)   | C12-C11-S1  | 119.19(8)  |
| C5-C1-H1   | 108.8(9)   | C16-C11-S1  | 119.49(8)  |
| C2-C1-H1   | 113.0(9)   | C13-C12-C11 | 119.70(10) |
| C3-C2-C1   | 103.59(10) | C13-C12-H12 | 119.5(9)   |
| C3-C2-H2A  | 110.8(10)  | C11-C12-H12 | 120.7(9)   |
| C1-C2-H2A  | 111.6(10)  | C14-C13-C12 | 117.85(10) |
| C3-C2-H2B  | 115.1(9)   | C14-C13-H13 | 121.4(10)  |
| C1-C2-H2B  | 110.4(9)   | C12-C13-H13 | 120.7(10)  |
| H2A-C2-H2B | 105.5(13)  | C15-C14-C13 | 123.30(10) |
| C2-C3-C4   | 104.10(10) | C15-C14-N2  | 118.59(10) |
| C2-C3-H3A  | 112.9(12)  | C13-C14-N2  | 118.11(10) |
| C4-C3-H3A  | 110.7(11)  | C14-C15-C16 | 118.45(11) |
| C2-C3-H3B  | 111.3(10)  | C14-C15-H15 | 120.1(9)   |
| C4-C3-H3B  | 108.1(11)  | C16-C15-H15 | 121.4(9)   |
| H3A-C3-H3B | 109.4(15)  | C15-C16-C11 | 119.38(11) |
| N1-C4-C7   | 113.36(9)  | C15-C16-H16 | 119.9(10)  |
| N1-C4-C3   | 100.35(9)  | C11-C16-H16 | 120.8(10)  |

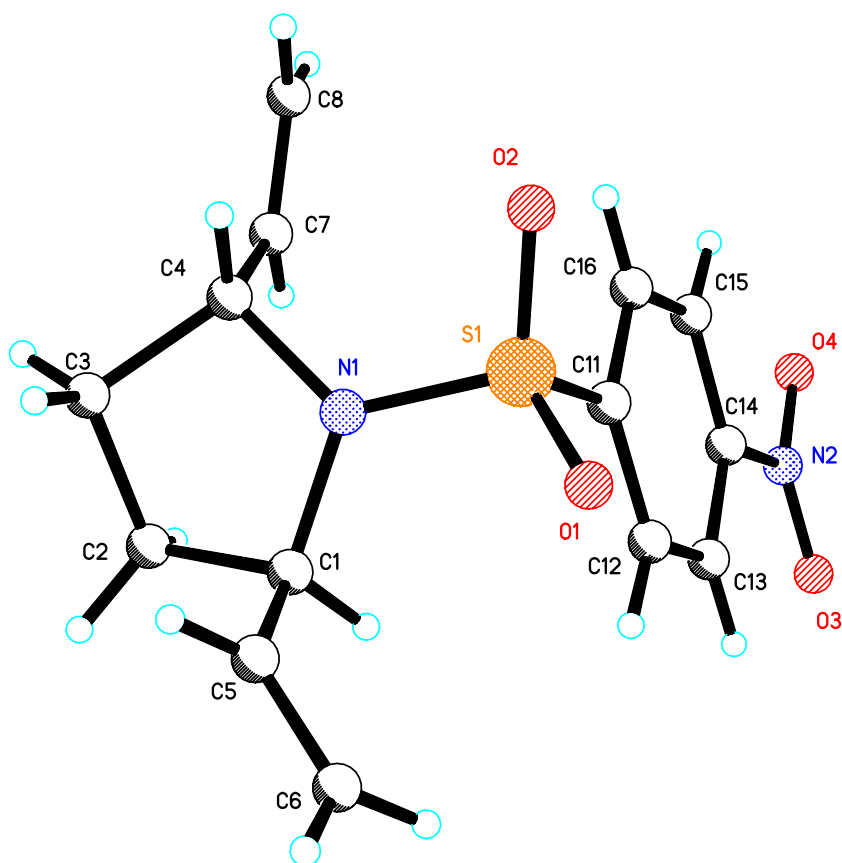

Supplement: b505197e.pdf [file b505197e.pdf]
